# Supplementary material for: Small Vessel Impact on the Whistle Parameters of Two Ecotypes of Common Bottlenose Dolphin (Tursiops truncatus) in La Paz Bay, Mexico
Source: MDPI journal article supplement (doi:10.3390/d14090712), 2022-08-28
Supplement: s1 [file s1]

## Supplementary Material

# Small Vessel Impact on the Whistle Parameters of Two Ecotypes of Common Bottlenose Dolphin (*Tursiops truncatus*) in La Paz Bay, Mexico

Simone Antichi <sup>1,\*</sup>, Armando M. Jaramillo-Legorreta <sup>2</sup>, Jorge Urbán R. <sup>1</sup>, Sergio Martínez-Aguilar <sup>1</sup> and Lorena Viloria-Gómora <sup>1</sup>

<sup>1</sup> Departamento de Ciencias Marinas y Costeras, Universidad Autónoma de Baja California Sur, Sur KM 5.5, La Paz CP 23080, Baja California Sur, Mexico

<sup>2</sup> Comisión Nacional de Áreas Naturales Protegidas, Dirección Regional Península de Baja California y Pacífico Norte, SEMARNAT. Carr. Ens-Tij. 3911. Zona Playitas. Camper #10, Ensenada CP 22860, Baja California, Mexico

\* Correspondence: santichi\_20@alu.uabcs.mx

Table S1 – Data collected in presence of a single small vessel.

| Sighting     | Ecotype | Nº recordings | Number of whistles per interval |           |           |
|--------------|---------|---------------|---------------------------------|-----------|-----------|
|              |         |               | Before                          | During    | After     |
| 1            | Oceanic | 2             | 17                              | 4         | -         |
| 2            | Oceanic | 1             | -                               | -         | 15        |
| 3            | Oceanic | 1             | 7                               | 9         | 7         |
| 4            | Oceanic | 1             | 21                              | 3         | 22        |
| <b>Total</b> |         | <b>5</b>      | <b>45</b>                       | <b>16</b> | <b>44</b> |
| 1            | Coastal | 1             | -                               | 1         | -         |
| 2            | Coastal | 1             | 2                               | -         | 1         |
| 3            | Coastal | 2             | 2                               | 2         | 2         |
| 4            | Coastal | 1             | 6                               | 2         | -         |
| 5            | Coastal | 1             | 2                               | 4         | 2         |
| 6            | Coastal | 1             | -                               | 2         | 2         |
| 7            | Coastal | 1             | -                               | -         | -         |
| 8            | Coastal | 1             | -                               | 5         | 14        |
| 9            | Coastal | 1             | 11                              | 1         | 16        |
| 10           | Coastal | 1             | -                               | -         | 1         |
| <b>Total</b> |         | <b>11</b>     | <b>23</b>                       | <b>17</b> | <b>38</b> |

## Coastal habitat

## Oceanic habitat

a)

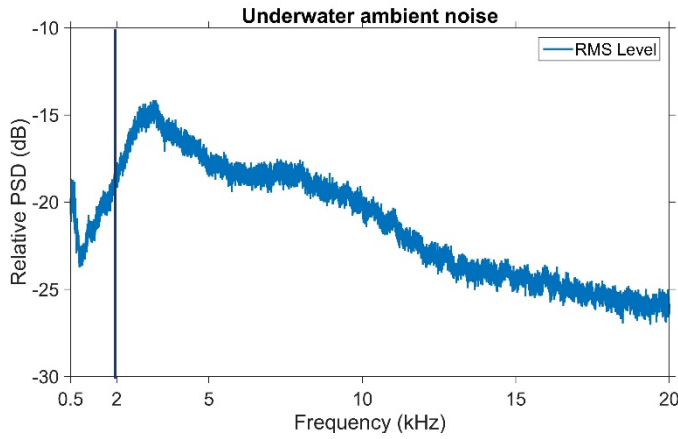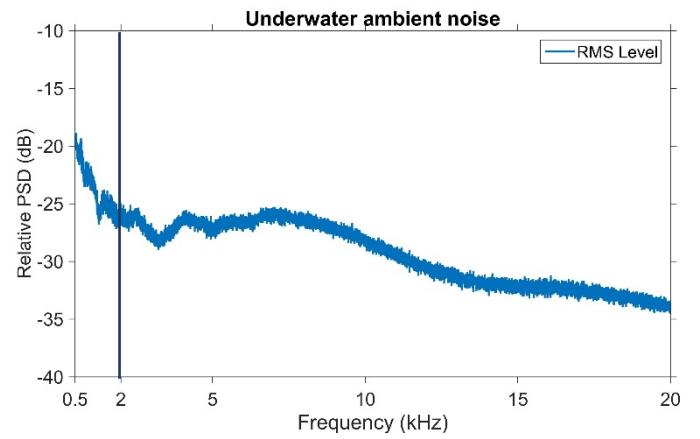

b)

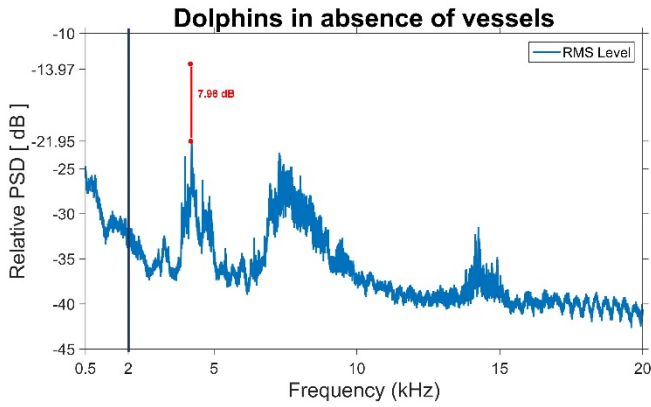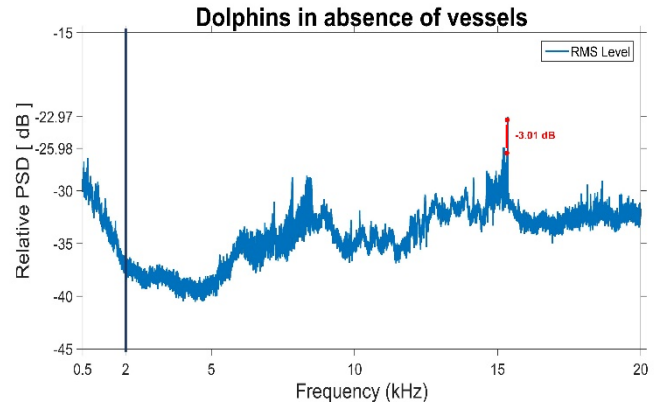

c)

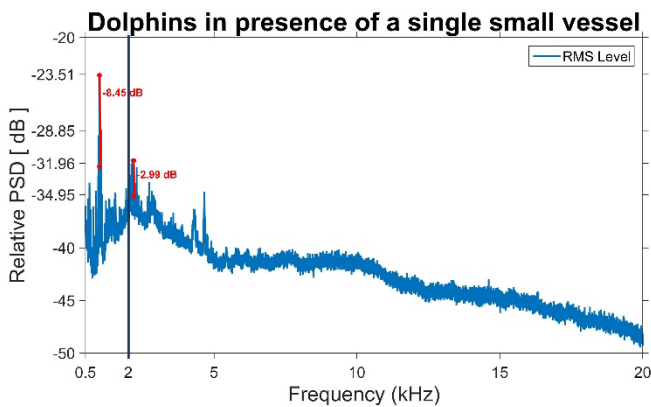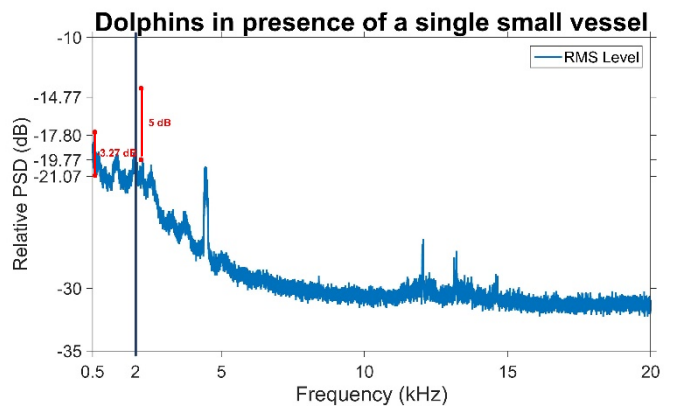

Figure S1. Relative power spectral density in coastal and oceanic habitats.

Figure S1 shows a selection of six audio samples (2 minutes long each) recorded in coastal and oceanic habitat in a) absence of dolphins and vessels b) presence of dolphins and absence of vessels c) presence of dolphins and of a single small vessel. The bandwidths 0.5 - 2 kHz and 2 - 20 kHz are the frequency range representing the small vessel and the whistles respectively. The RMS level in absence of dolphins and vessels (Figure S1a)

showed higher noise levels towards the low frequency band with no distinct clear peaks. The RMS levels in presence of dolphins and dolphins together with vessels (Figure S1b, c) revealed peaks. Peak noise of the vessel bandwidth was corrected considering the difference between the distance of the small moving vessel to the research vessel and to the dolphins. The peak noise of the whistles bandwidth was adjusted considering the difference between the distance dolphins-research vessel in the recording being analyzed and the average distance dolphins-research vessel of all the sightings. The red points in Figure S1b and c display the peak values before and after the correction.
